# Supplementary material
Source: MDPI journal article supplement (https://www.mdpi.com/2077-1312/11/4/860)
Supplement: s1 [file s1]

A)

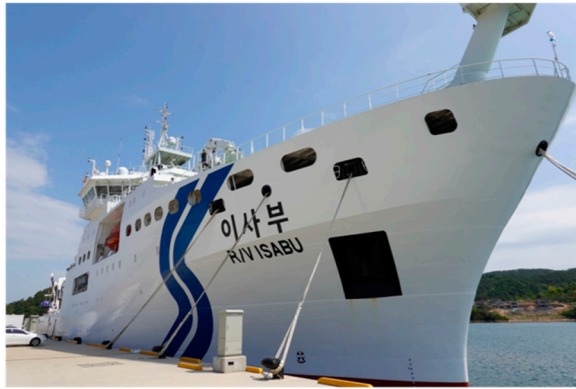

B)

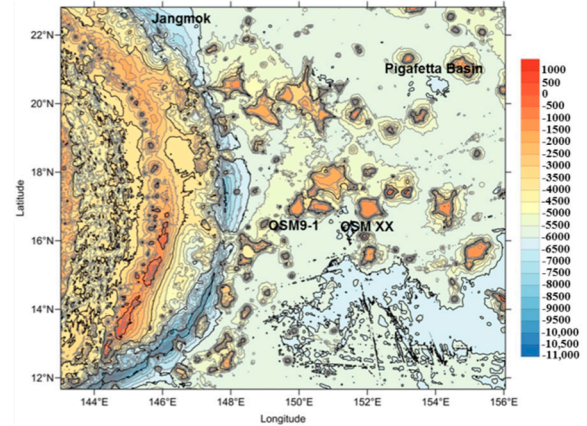

**Supplementary Figure S1.** (A) The research vessel *ISABU*. (B) Sampling sites of *Synaphobranchus brevidorsalis* and *Synaphobranchus affinis* on the East Mariana Basin in the western Pacific Ocean.

**Supplementary Table S1.** List of the species and sample sites.

| Species                              | Geographical Area | Latitude | Longitude | Depth (m) |
|--------------------------------------|-------------------|----------|-----------|-----------|
| <i>Synaphobranchus brevidorsalis</i> | OSM9-1            | 16°58N   | 149°50E   | 1436      |
| <i>Synaphobranchus affinis</i>       | OSMXX             | 16°06N   | 151°53E   | 1475      |

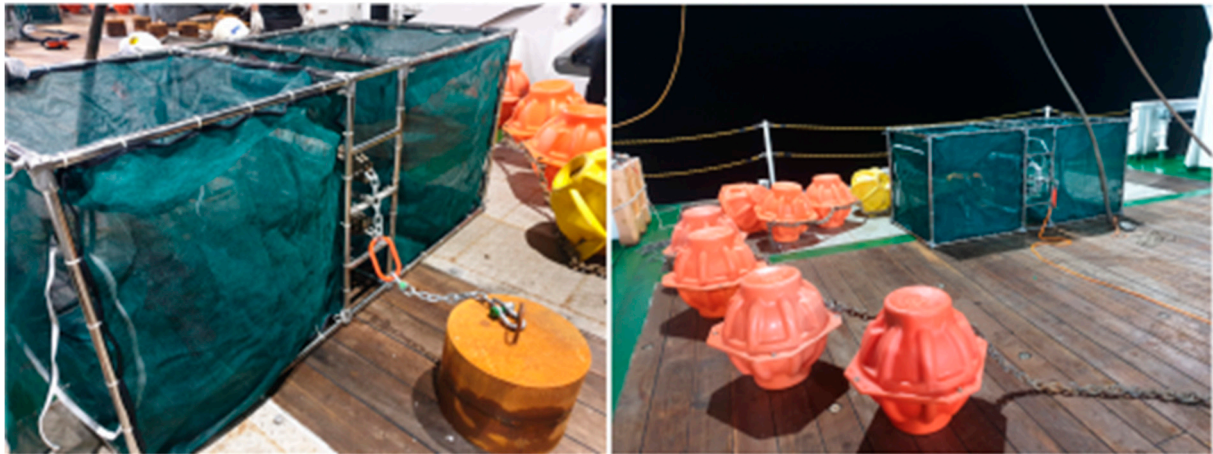

**Supplementary Figure S2.** Fish sampling using bait traps (composed of fish).

**A) *Synaphobranchus brevidorsalis***

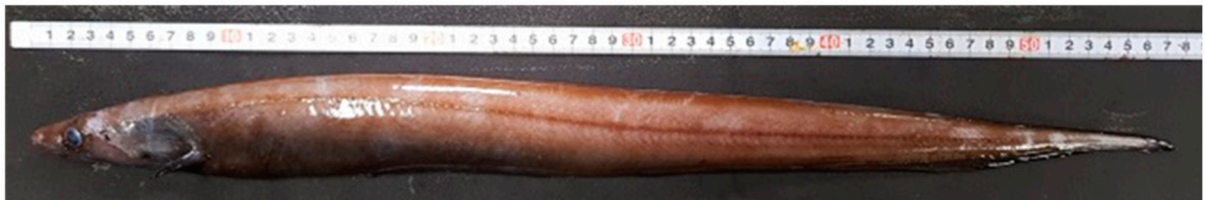

**B) *Synaphobranchus affinis***

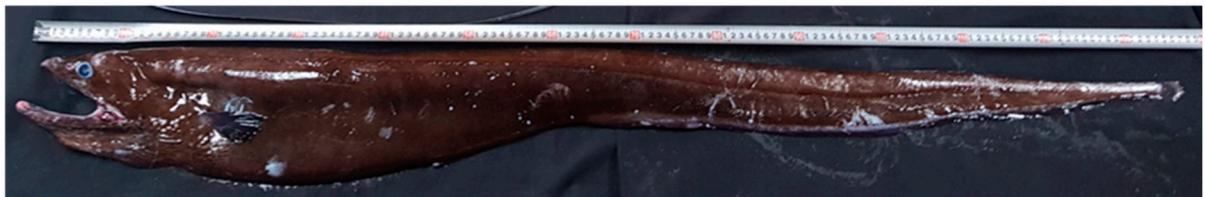

**Supplementary Figure S3.** Photographs of two deep-sea eel specimens. (A) *Synaphobranchus brevidorsalis* and (B) *S. affinis*.
